# Supplementary material for: Development of gum acacia based magnetic nanocomposite adsorbent for wastewater treatment
Source: Research Square preprint supplement (doi:10.21203/rs.3.rs-408981/v1), 2021-04-21
Supplement: Supplementary file 1 [file 3d99938c6022f070060b9768.docx]

**Supporting Information**


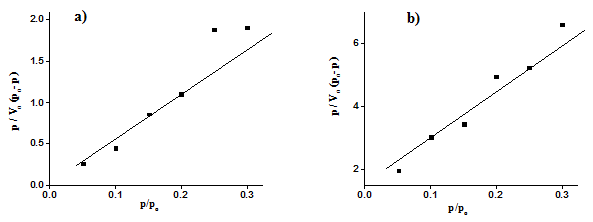


**Fig. S1:** BET plot for a) GA-*g*-PCHPMA b) GA-*g*-PCHPMA/Fe3O4


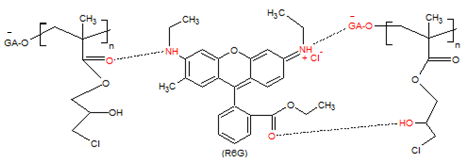


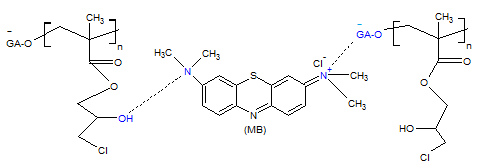


**Fig.** **S2**: Proposed mechanism for the adsorption of MB and R6G on the adsorbent GA-*g*-PCHPMA


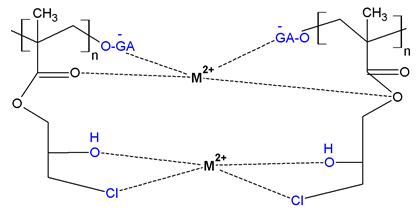


**Fig. S3**: Proposed mechanism for the adsorption of divalent metal ions (Cu(II) and Hg(II)) on the adsorbent GA-*g*-PCHPMA


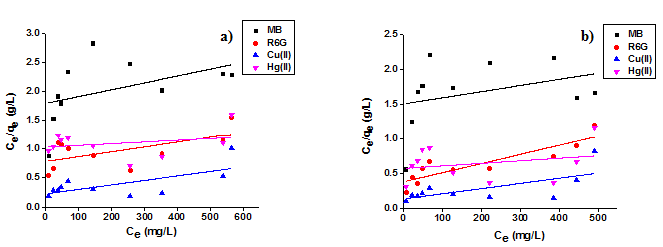


**Fig. S4**: Langmuir isotherm model fit for the adsorption of dyes and metal ions on a) GA–*g*–PCHPMA and b) GA–*g*–PCHPMA/Fe3O4


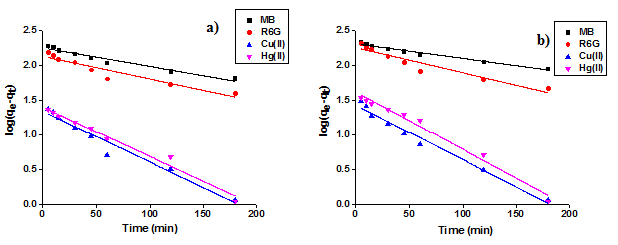


**Fig. S5**: Pseudo first order kinetic plot for adsorption of dyes and metal ions on a) GA–*g*–PCHPMA b) GA–*g*–PCHPMA/Fe3O4
